# Supplementary material for: Cognitive and Behavioral Factors Predicting the Decision to Vaccinate against COVID-19 in Clinical Psychiatric Population—A Cross-Sectional Survey
Source: MDPI journal article supplement (doi:10.3390/vaccines11020441), 2023-02-15

Table S3: SM\_Logistic\_Regression\_results

## Binomial Logistic Regression

| Legend             |                                     |
|--------------------|-------------------------------------|
| (1) PERC_RISK_VACC | Perceived risk of vaccination       |
| (2) PERC_RISK_VACC | Perceived risk of vaccination       |
| (3) PERC_UNCERTAIN | Perceived uncertainty               |
| (4) TRUST_VACC_DEC | Trust in vaccination decision       |
| (5) PREV_VACC      | Previous vaccination                |
| (6) SOCIAL_MEDIA   | Social media use                    |
| (7) PREV_BEHAV     | Engagement in preventive behaviours |

### Model Fit Measures

| Model | Deviance | AIC | R <sup>2</sup> <sub>McF</sub> | R <sup>2</sup> <sub>CS</sub> | R <sup>2</sup> <sub>N</sub> | Overall Model Test |    |        |
|-------|----------|-----|-------------------------------|------------------------------|-----------------------------|--------------------|----|--------|
|       |          |     |                               |                              |                             | $\chi^2$           | df | p      |
| 1     | 218      | 238 | 0.309                         | 0.320                        | 0.449                       | 97.2               | 9  | < .001 |

### Model Coefficients - VACCINAT

| Predictor           | Estimate | SE    | Z      | p      | Odds ratio | 95% Confidence Interval |        |
|---------------------|----------|-------|--------|--------|------------|-------------------------|--------|
|                     |          |       |        |        |            | Lower                   | Upper  |
| Intercept           | 0.6092   | 1.980 | 0.308  | 0.758  | 1.839      | 0.0379                  | 89.105 |
| (5) PREV_VACC:      |          |       |        |        |            |                         |        |
| Nu – Da             | 0.3707   | 0.392 | 0.946  | 0.344  | 1.449      | 0.6722                  | 3.123  |
| (4) TRUST_VACC_DEC: |          |       |        |        |            |                         |        |
| scazut – ridicat    | 2.1901   | 0.619 | 3.540  | < .001 | 8.936      | 2.6579                  | 30.045 |
| mediu – ridicat     | 1.0555   | 0.419 | 2.520  | 0.012  | 2.873      | 1.2645                  | 6.529  |
| (1) PERC_RISK_ILL   | 0.2333   | 0.146 | 1.600  | 0.110  | 1.263      | 0.9489                  | 1.680  |
| (1) PERC_RISK_VACC  | -1.5639  | 0.239 | -6.530 | < .001 | 0.209      | 0.1309                  | 0.335  |
| (2) PERC_VULN       | -0.0309  | 0.120 | -0.257 | 0.797  | 0.970      | 0.7660                  | 1.227  |
| (3) PERC_UNCERTAIN  | 0.1504   | 0.209 | 0.720  | 0.471  | 1.162      | 0.7719                  | 1.750  |
| (6) SOCIAL_MEDIA    | -0.0399  | 0.128 | -0.312 | 0.755  | 0.961      | 0.7476                  | 1.235  |
| (7) PREV_BEHAV      | 0.5170   | 0.273 | 1.895  | 0.058  | 1.677      | 0.9824                  | 2.863  |

Note. Estimates represent the log odds of "VACCINAT = Nu" vs. "VACCINAT = Da"

## Assumption Checks

### Collinearity Statistics

|                    | VIF  | Tolerance |
|--------------------|------|-----------|
| (5) PREV_VACC      | 1.04 | 0.960     |
| (4) TRUST_VACC_DEC | 1.03 | 0.970     |
| (1) PERC_RISK_ILL  | 1.23 | 0.816     |
| (1) PERC_RISK_VACC | 1.08 | 0.929     |
| (2) PERC_VULN      | 1.24 | 0.807     |
| (3) PERC_UNCERTAIN | 1.01 | 0.986     |
| (6) SOCIAL_MEDIA   | 1.03 | 0.967     |
| (7) PREV_BEHAV     | 1.11 | 0.904     |

## Prediction

### Cut-Off Plot

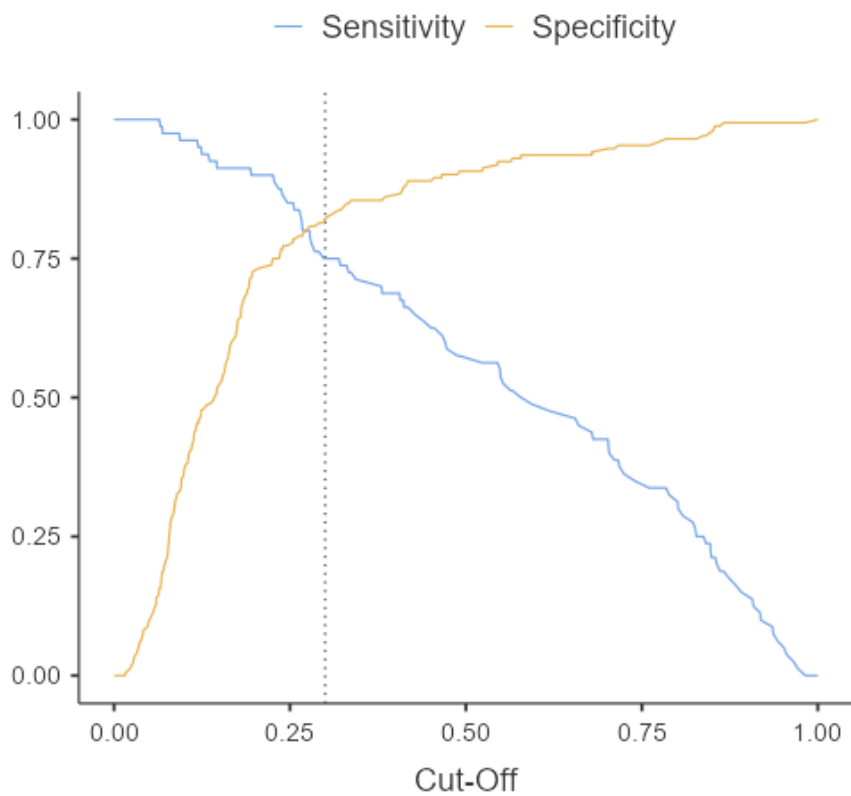

Classification Table – ...

| Observed | Predicted |    |           |
|----------|-----------|----|-----------|
|          | Da        | Nu | % Correct |
| Da       | 142       | 30 | 82.6      |
| Nu       | 20        | 60 | 75.0      |

Note. The cut-off value is set to 0.3

Predictive Measures

| Accuracy | Specificity | Sensitivity | AUC   |
|----------|-------------|-------------|-------|
| 0.802    | 0.826       | 0.750       | 0.868 |

Note. The cut-off value is set to 0.3

## ROC Curve

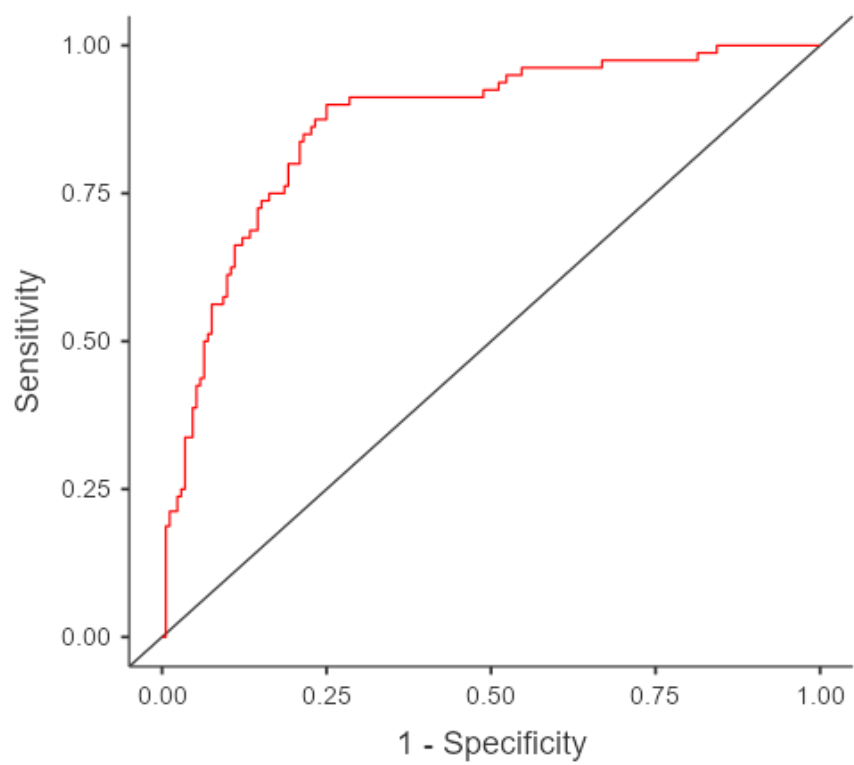

Supplement: s1 [file s1]
