# Supplementary material for: Cognitive and Behavioral Factors Predicting the Decision to Vaccinate against COVID-19 in Clinical Psychiatric Population—A Cross-Sectional Survey
Source: MDPI journal article supplement (doi:10.3390/vaccines11020441), 2023-02-15

Table S4: SM\_TOST\_correlations

## TOST Correlation

Correlation method: Spearman's rho

Hypothesis Tested: Equivalence

Bounds: -0.3 - 0.3

| Legend             |                                     |
|--------------------|-------------------------------------|
| (1) PERC_RISK_VACC | Perceived risk of vaccination       |
| (2) PERC_RISK_VACC | Perceived risk of vaccination       |
| (3) PERC_UNCERTAIN | Perceived uncertainty               |
| (4) TRUST_VACC_DEC | Trust in vaccination decision       |
| (5) PREV_VACC      | Previous vaccination                |
| (6) SOCIAL_MEDIA   | Social media use                    |
| (7) PREV_BEHAV     | Engagement in preventive behaviours |

### TOST Results

|                       |                      |        |       | 90% Confidence Interval |         |       |       |             |             |
|-----------------------|----------------------|--------|-------|-------------------------|---------|-------|-------|-------------|-------------|
|                       |                      |        |       | r                       | p       | Lower | Upper | Sig. Result | TOST Result |
| (1)PERC_RISK_VACC     | (7)PREV_BEHAV        | 0.259  | <.001 | 0.157                   | 0.3563  | TRUE  | FALSE |             |             |
| (2) PERC_VULN         | (1)PERC_RISK_VACC    | 0.211  | <.001 | 0.107                   | 0.3113  | TRUE  | FALSE |             |             |
| (2) PERC_VULN         | (1)PERC_RISK_Illness | 0.488  | <.001 | 0.402                   | 0.5657  | TRUE  | FALSE |             |             |
| (6)SOCIAL_MEDIA_BEHAV | (1)PERC_RISK_Illness | -0.127 | 0.044 | -0.231                  | -0.0202 | TRUE  | TRUE  |             |             |
| (6)SOCIAL_MEDIA_BEHAV | (1)PERC_RISK_VACC    | -0.196 | 0.002 | -0.297                  | -0.0912 | TRUE  | TRUE  |             |             |
| (6)SOCIAL_MEDIA_BEHAV | (2) PERC_VULN        | -0.177 | 0.005 | -0.279                  | -0.0713 | TRUE  | TRUE  |             |             |

### Descriptives

|                       | N   | Mean  | Median | SD    | SE     |
|-----------------------|-----|-------|--------|-------|--------|
| (1)PERC_RISK_VACC     | 252 | 3.987 | 4.286  | 0.832 | 0.0524 |
| (7)PREV_BEHAV         | 252 | 3.78  | 3.92   | 0.674 | 0.0425 |
| (2) PERC_VULN         | 252 | 5.209 | 5.250  | 1.732 | 0.1091 |
| (1)PERC_RISK_VACC     | 252 | 3.99  | 4.29   | 0.832 | 0.0524 |
| (2) PERC_VULN         | 252 | 5.209 | 5.250  | 1.732 | 0.1091 |
| (1)PERC_RISK_Illness  | 252 | 5.41  | 5.50   | 1.473 | 0.0928 |
| (6)SOCIAL_MEDIA_BEHAV | 252 | 0.992 | 0.500  | 1.404 | 0.0884 |
| (1)PERC_RISK_Illness  | 252 | 5.41  | 5.50   | 1.473 | 0.0928 |
| (6)SOCIAL_MEDIA_BEHAV | 252 | 0.992 | 0.500  | 1.404 | 0.0884 |
| (1)PERC_RISK_VACC     | 252 | 3.99  | 4.29   | 0.832 | 0.0524 |
| (6)SOCIAL_MEDIA_BEHAV | 252 | 0.992 | 0.500  | 1.404 | 0.0884 |
| (2) PERC_VULN         | 252 | 5.21  | 5.25   | 1.732 | 0.1091 |

## Plots

(1)PERC\_RISK\_VACC - (7)PREV\_BEHAV

Confidence Interval ■ 0.68 ■ 0.9 ■ 0.95 ■ 0.99

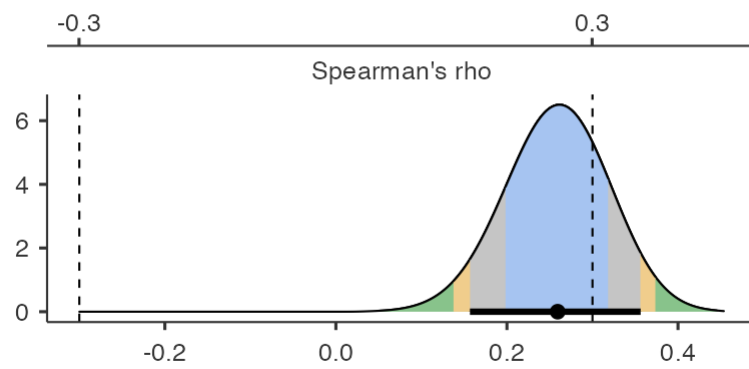

**(2) PERC\_VULN - (1)PERC\_RISK\_VACC**

Confidence Interval ■ 0.68 ■ 0.9 ■ 0.95 ■ 0.99

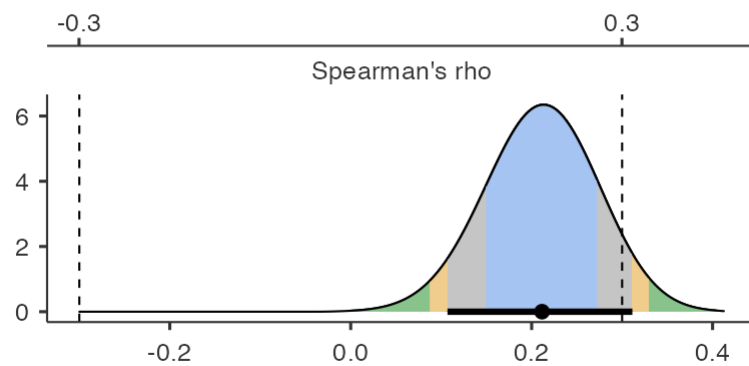

**(2) PERC\_VULN - (1)PERC\_RISK\_Illness**

Confidence Interval ■ 0.68 ■ 0.9 ■ 0.95 ■ 0.99

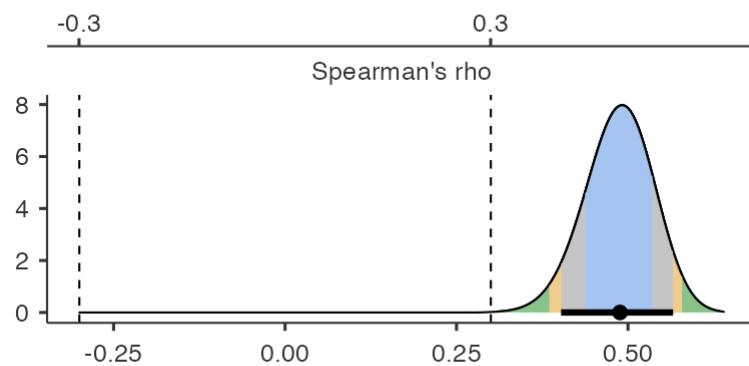

**(6)SOCIAL\_MEDIA\_BEHAV - (1)PERC\_RISK\_Illness**

Confidence Interval 0.68 0.9 0.95 0.99

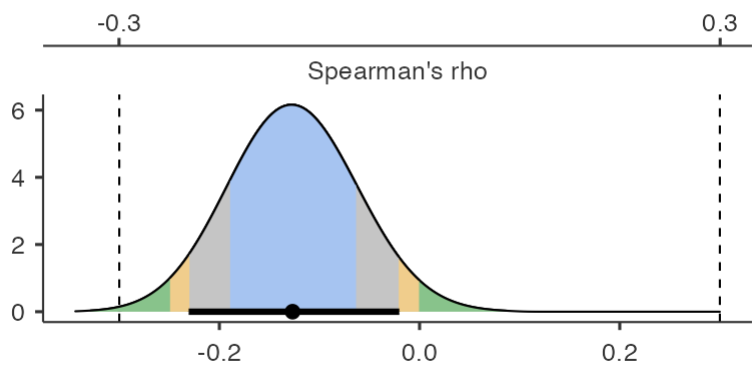

(6)SOCIAL\_MEDIA\_BEHAV - (1)PERC\_RISK\_VACC

Confidence Interval 0.68 0.9 0.95 0.99

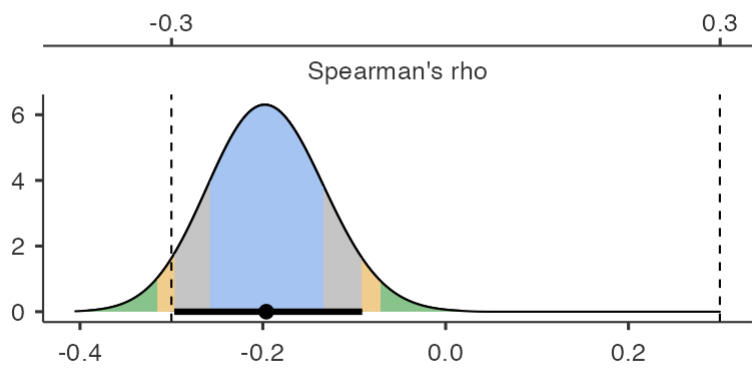

(6)SOCIAL\_MEDIA\_BEHAV - (2) PERC\_VULN

Confidence Interval 0.68 0.9 0.95 0.99

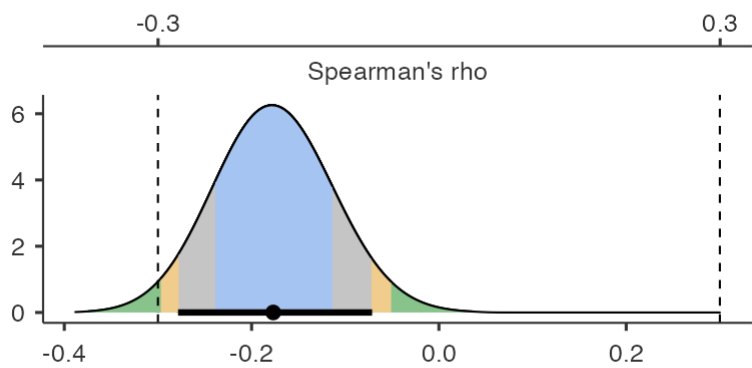

Supplement: s1 [file s1]
