# Supplementary material for: Cognitive and Behavioral Factors Predicting the Decision to Vaccinate against COVID-19 in Clinical Psychiatric Population—A Cross-Sectional Survey
Source: MDPI journal article supplement (doi:10.3390/vaccines11020441), 2023-02-15

Table S2: SM\_Normality\_tests

Descriptives

Descriptives

|                       | N   | Missing | Mean  | Median | SD    | Variance | Minimum | Maximum | Shapiro-Wilk |       |
|-----------------------|-----|---------|-------|--------|-------|----------|---------|---------|--------------|-------|
|                       |     |         |       |        |       |          |         |         | W            | p     |
| (1)PERC_RISK_VACC     | 252 | 0       | 3.987 | 4.286  | 0.832 | 0.693    | 1.00    | 5.00    | 0.900        | <.001 |
| (1)PERC_RISK_Illness  | 252 | 0       | 5.412 | 5.500  | 1.473 | 2.171    | 1.00    | 9.13    | 0.990        | 0.076 |
| (2) PERC_VULN         | 252 | 0       | 5.209 | 5.250  | 1.732 | 3.000    | 1.00    | 9.25    | 0.984        | 0.007 |
| (3)PERC_UNCERTAIN     | 252 | 0       | 6.304 | 6.500  | 0.806 | 0.649    | 2.00    | 7.00    | 0.813        | <.001 |
| (4)TRUST_OWN_DEC      | 252 | 0       | 8.190 | 10.000 | 2.566 | 6.585    | 1       | 10      | 0.732        | <.001 |
| (6)SOCIAL_MEDIA_BEHAV | 252 | 0       | 0.992 | 0.500  | 1.404 | 1.970    | 0.00    | 10.50   | 0.691        | <.001 |
| (7)PREV_BEHAV         | 252 | 0       | 3.783 | 3.917  | 0.674 | 0.455    | 1.50    | 5.00    | 0.971        | <.001 |

Plots

(1)PERC\_RISK\_VACC

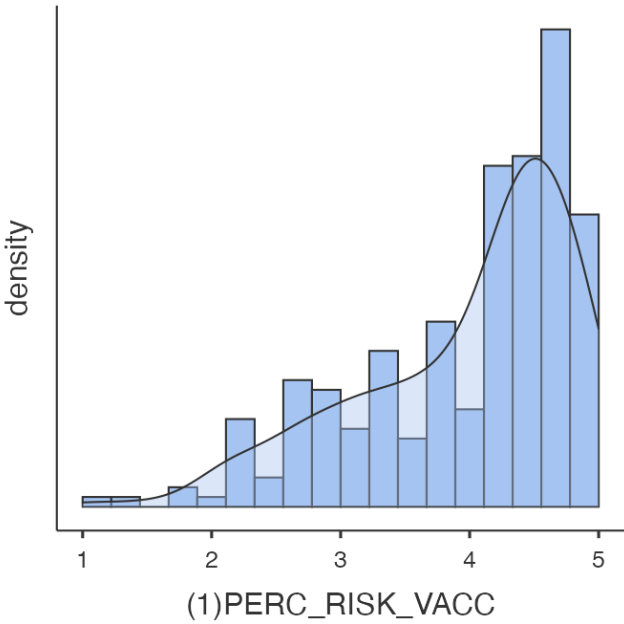

| Legend             |                                     |
|--------------------|-------------------------------------|
| (1) PERC_RISK_VACC | Perceived risk of vaccination       |
| (2) PERC_RISK_VACC | Perceived risk of vaccination       |
| (3) PERC_UNCERTAIN | Perceived uncertainty               |
| (4) TRUST_VACC_DEC | Trust in vaccination decision       |
| (5) PREV_VACC      | Previous vaccination                |
| (6) SOCIAL_MEDIA   | Social media use                    |
| (7) PREV_BEHAV     | Engagement in preventive behaviours |

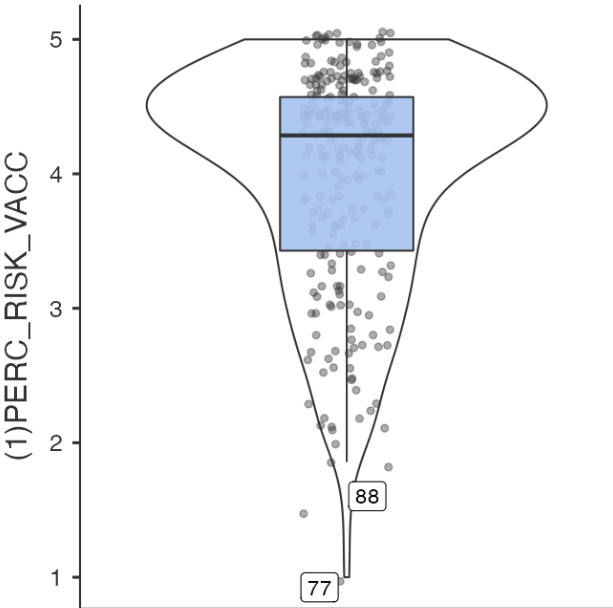

## (1)PERC\_RISK\_Illness

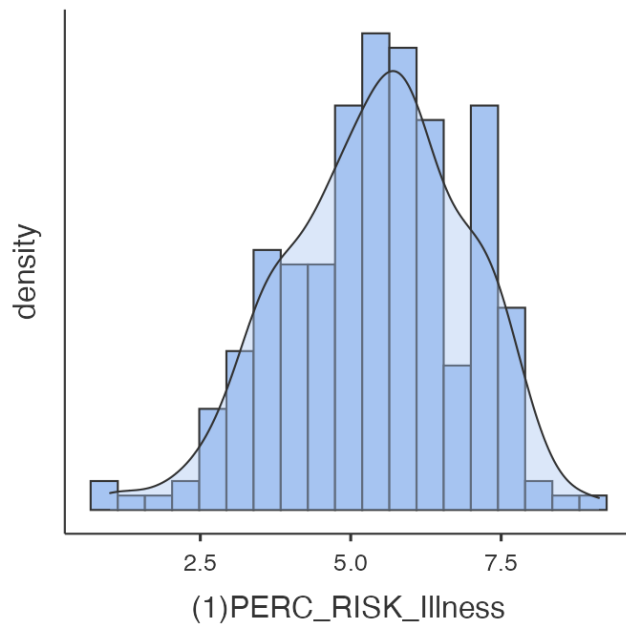

| Legend             |                                     |
|--------------------|-------------------------------------|
| (1) PERC_RISK_VACC | Perceived risk of vaccination       |
| (2) PERC_RISK_VACC | Perceived risk of vaccination       |
| (3) PERC_UNCERTAIN | Perceived uncertainty               |
| (4) TRUST_VACC_DEC | Trust in vaccination decision       |
| (5) PREV_VACC      | Previous vaccination                |
| (6) SOCIAL_MEDIA   | Social media use                    |
| (7) PREV_BEHAV     | Engagement in preventive behaviours |

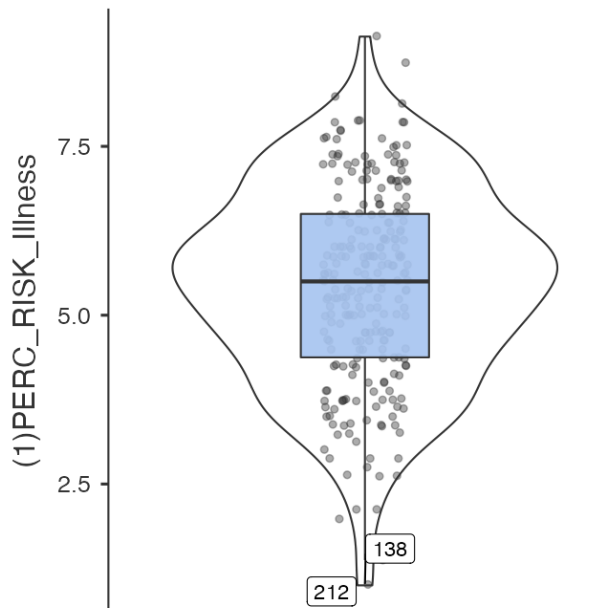

## (2) PERC\_VULN

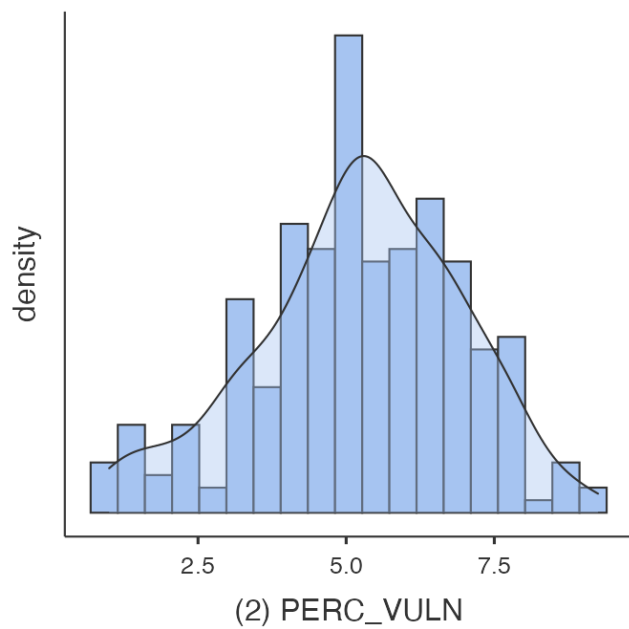

| Legend             |                                     |
|--------------------|-------------------------------------|
| (1) PERC_RISK_VACC | Perceived risk of vaccination       |
| (2) PERC_RISK_VACC | Perceived risk of vaccination       |
| (3) PERC_UNCERTAIN | Perceived uncertainty               |
| (4) TRUST_VACC_DEC | Trust in vaccination decision       |
| (5) PREV_VACC      | Previous vaccination                |
| (6) SOCIAL_MEDIA   | Social media use                    |
| (7) PREV_BEHAV     | Engagement in preventive behaviours |

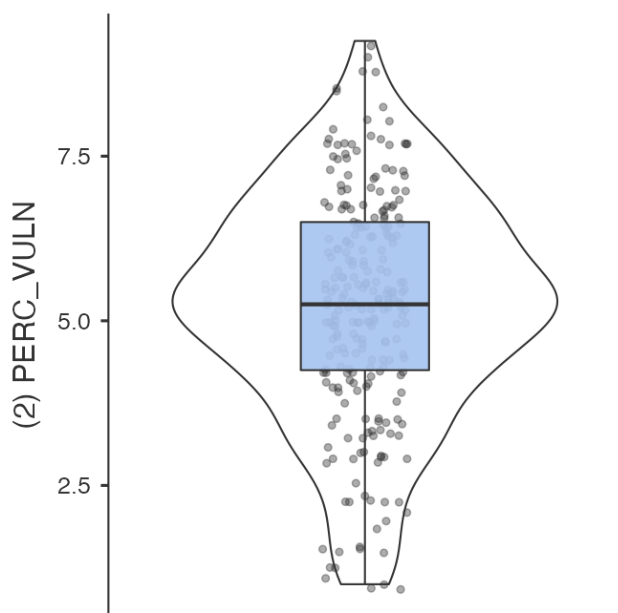

(3)PERC\_UNCERTAIN

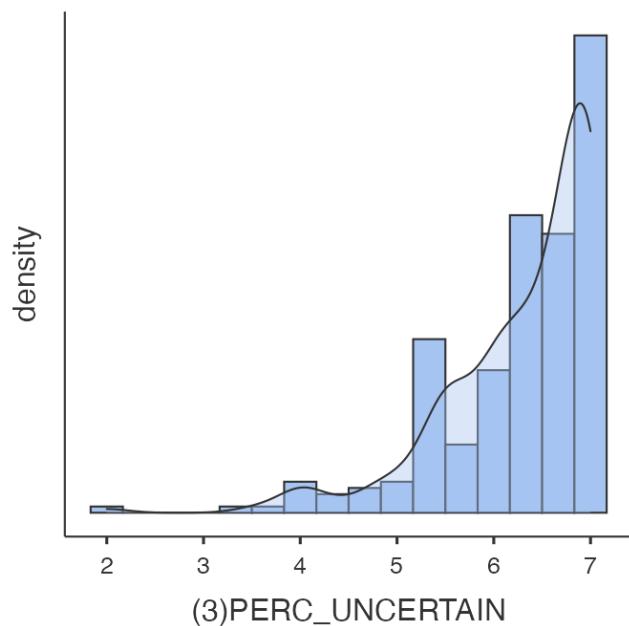

| Legend             |                                     |
|--------------------|-------------------------------------|
| (1) PERC_RISK_VACC | Perceived risk of vaccination       |
| (2) PERC_RISK_VACC | Perceived risk of vaccination       |
| (3) PERC_UNCERTAIN | Perceived uncertainty               |
| (4) TRUST_VACC_DEC | Trust in vaccination decision       |
| (5) PREV_VACC      | Previous vaccination                |
| (6) SOCIAL_MEDIA   | Social media use                    |
| (7) PREV_BEHAV     | Engagement in preventive behaviours |

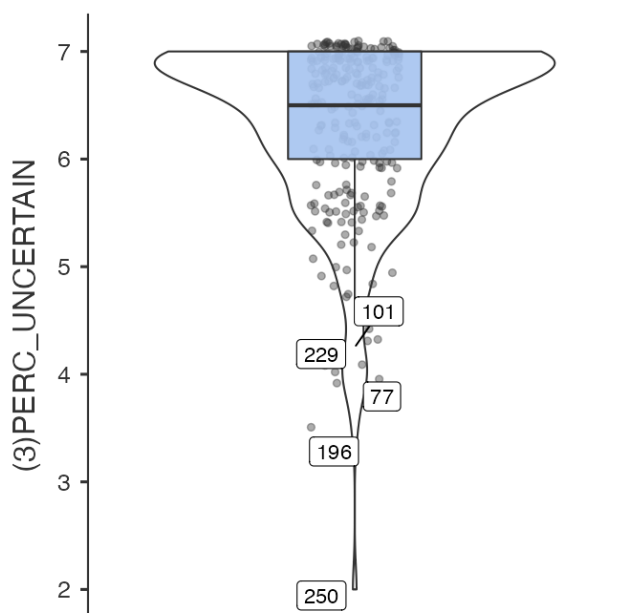

(4)TRUST\_OWN\_DEC

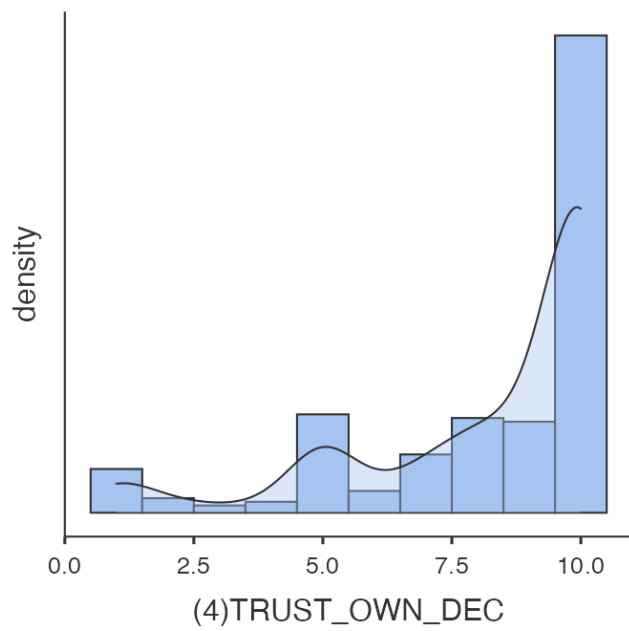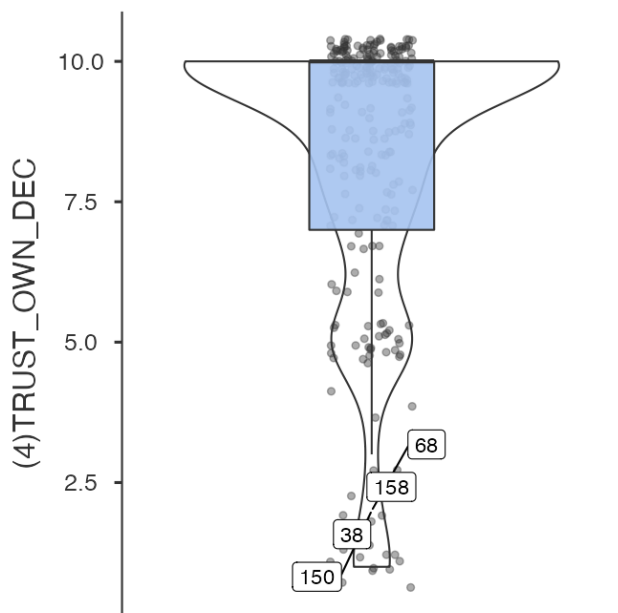

(6)SOCIAL\_MEDIA\_BEHAV

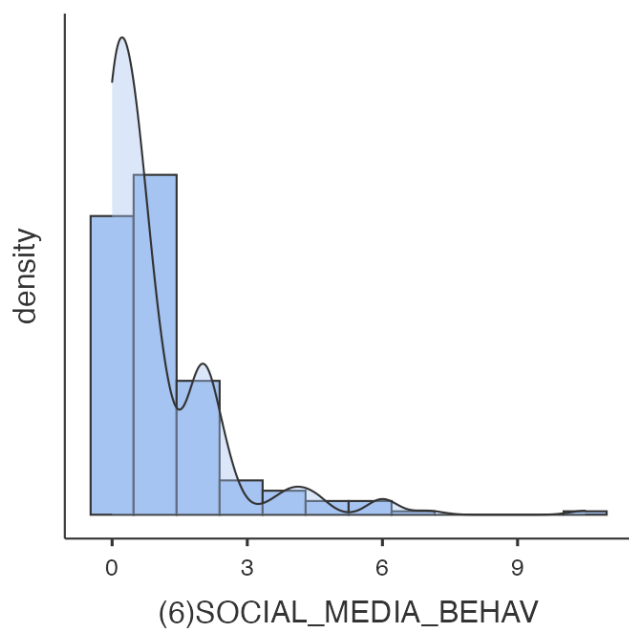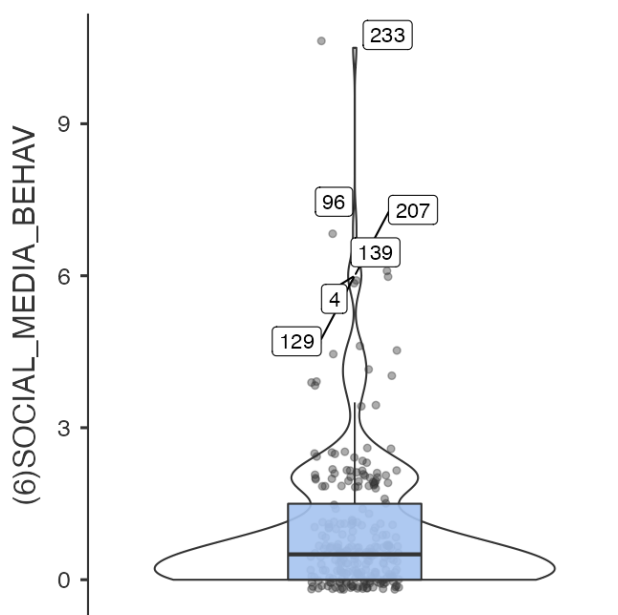

(7)PREV\_BEHAV

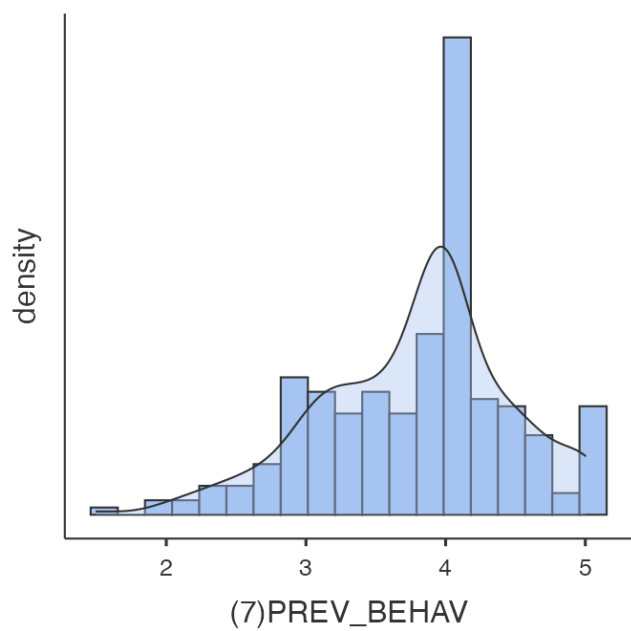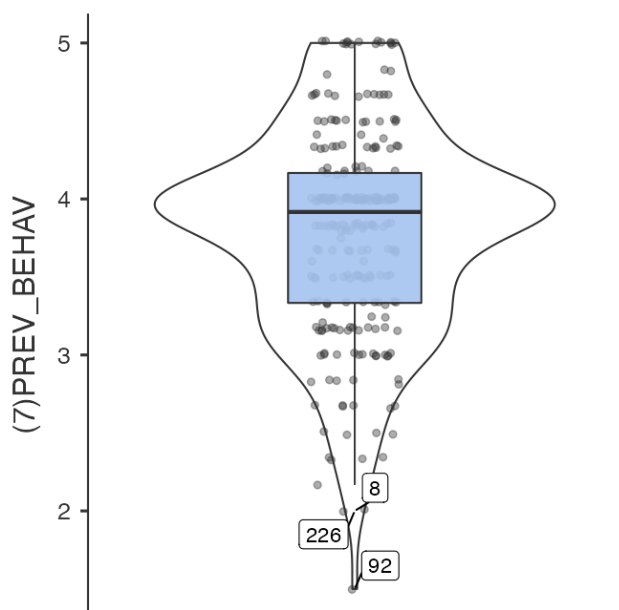

Supplement: s1 [file s1]
