# Supplementary material for: Cognitive and Behavioral Factors Predicting the Decision to Vaccinate against COVID-19 in Clinical Psychiatric Population—A Cross-Sectional Survey
Source: MDPI journal article supplement (doi:10.3390/vaccines11020441), 2023-02-15
Supplement: s1 [file s1]

## SM\_Annex 1 – Questionnaire

### QUESTIONNAIRE DEC\_VCC\_01

HIPPA Code: \_\_\_\_\_

(the first two letters of the name, the first two letters of the surname, the first letter of the city, the last two digits of the CI)

#### Consent to participate in research

I voluntarily agree to participate to this study. I understand that even if now I agree to participate, I can withdraw at any time or refuse to answer to any question without a consequence of any kind.

The purpose and nature of this study was explained to me and I was given the opportunity to ask questions about the study. I understand that participation involves determining the acceptance and risk perception of the COVID-19 vaccine in Romania.

I understand that I will not directly benefit from participating in this research.

I understand that all information I provide for this study will be treated confidentially.

I understand that in any reporting of the research results my identity will remain anonymous.

By choosing yes, I agree to participate in this study

By choosing the NO option, I will not participate in this study

A. YES

B. NO

#### (I) PERSONAL / MEDICAL DATA

Age: \_\_\_\_\_ Gender: \_\_\_\_\_

City / County: \_\_\_\_\_

Diagnosis at admission:

\_\_\_\_\_  
\_\_\_\_\_

Length of hospitalization (days): \_\_\_\_\_

Other evident/reported co-morbidities: \_\_\_\_\_

Treatment: \_\_\_\_\_

\_\_\_\_\_  
Smoking? Yes / No

Did he/ she do other types of vaccine? yes / no when \_\_\_\_\_

Did he/she have any problems after the vaccine? yes / no. How did they manifest?

\_\_\_\_\_

Any other health issues that should be mentioned?

---

## (II) PERCEIVED DISEASE RISK

1. How likely do you think you are to get the flu?

|                       |                       |                       |                       |                       |                       |                       |                       |                       |                       |
|-----------------------|-----------------------|-----------------------|-----------------------|-----------------------|-----------------------|-----------------------|-----------------------|-----------------------|-----------------------|
| 1                     | 2                     | 3                     | 4                     | 5                     | 6                     | 7                     | 8                     | 9                     | 10                    |
| <input type="radio"/> |

1 = it is not likely at all

10 = extremely likely

2. How likely do you think you are to get Covid-19?

|                       |                       |                       |                       |                       |                       |                       |                       |                       |                       |
|-----------------------|-----------------------|-----------------------|-----------------------|-----------------------|-----------------------|-----------------------|-----------------------|-----------------------|-----------------------|
| 1                     | 2                     | 3                     | 4                     | 5                     | 6                     | 7                     | 8                     | 9                     | 10                    |
| <input type="radio"/> |

1 = it is not likely at all

10 = extremely likely

3. How severe do you think the flu is?

|                       |                       |                       |                       |                       |                       |                       |                       |                       |                       |
|-----------------------|-----------------------|-----------------------|-----------------------|-----------------------|-----------------------|-----------------------|-----------------------|-----------------------|-----------------------|
| 1                     | 2                     | 3                     | 4                     | 5                     | 6                     | 7                     | 8                     | 9                     | 10                    |
| <input type="radio"/> |

1 = it is not likely at all

10 = extremely likely

4. How severe do you think the disease caused by the SARS-Cov-2 virus is?

|                       |                       |                       |                       |                       |                       |                       |                       |                       |                       |
|-----------------------|-----------------------|-----------------------|-----------------------|-----------------------|-----------------------|-----------------------|-----------------------|-----------------------|-----------------------|
| 1                     | 2                     | 3                     | 4                     | 5                     | 6                     | 7                     | 8                     | 9                     | 10                    |
| <input type="radio"/> |

1 = it is not likely at all

10 = extremely likely

5. How scared do you feel about catching the flu?

|                       |                       |                       |                       |                       |                       |                       |                       |                       |                       |
|-----------------------|-----------------------|-----------------------|-----------------------|-----------------------|-----------------------|-----------------------|-----------------------|-----------------------|-----------------------|
| 1                     | 2                     | 3                     | 4                     | 5                     | 6                     | 7                     | 8                     | 9                     | 10                    |
| <input type="radio"/> |

1 = I don't feel scared at all

10 = extremely scared

6. How scared do you feel about contacting the Sars-Cov-2 virus?

|                       |                       |                       |                       |                       |                       |                       |                       |                       |                       |
|-----------------------|-----------------------|-----------------------|-----------------------|-----------------------|-----------------------|-----------------------|-----------------------|-----------------------|-----------------------|
| 1                     | 2                     | 3                     | 4                     | 5                     | 6                     | 7                     | 8                     | 9                     | 10                    |
| <input type="radio"/> |

1 = I don't feel scared at all

10 = extremely scared

7. How confident are you in the effectiveness of the flu vaccine?

|                       |                       |                       |                       |                       |                       |                       |                       |                       |                       |
|-----------------------|-----------------------|-----------------------|-----------------------|-----------------------|-----------------------|-----------------------|-----------------------|-----------------------|-----------------------|
| 1                     | 2                     | 3                     | 4                     | 5                     | 6                     | 7                     | 8                     | 9                     | 10                    |
| <input type="radio"/> |

1 = not confident

10 = extremely confident

8. How confident are you in the effectiveness of the Covid-19 vaccine?

|                       |                       |                       |                       |                       |                       |                       |                       |                       |                       |
|-----------------------|-----------------------|-----------------------|-----------------------|-----------------------|-----------------------|-----------------------|-----------------------|-----------------------|-----------------------|
| 1                     | 2                     | 3                     | 4                     | 5                     | 6                     | 7                     | 8                     | 9                     | 10                    |
| <input type="radio"/> |

1 = not confident

10 = extremely confident

### (III) PERCEPTION OF PERSONAL VULNERABILITY

1. Imagining myself infected with COVID-19 is:

|                       |                       |                       |                       |                       |                       |                       |                       |                       |                       |
|-----------------------|-----------------------|-----------------------|-----------------------|-----------------------|-----------------------|-----------------------|-----------------------|-----------------------|-----------------------|
| 1                     | 2                     | 3                     | 4                     | 5                     | 6                     | 7                     | 8                     | 9                     | 10                    |
| <input type="radio"/> |

1 = extremely easy

10 = extremely difficult

2. I am sure that I will not get infected with COVID-19:

|                       |                       |                       |                       |                       |                       |                       |                       |                       |                       |
|-----------------------|-----------------------|-----------------------|-----------------------|-----------------------|-----------------------|-----------------------|-----------------------|-----------------------|-----------------------|
| 1                     | 2                     | 3                     | 4                     | 5                     | 6                     | 7                     | 8                     | 9                     | 10                    |
| <input type="radio"/> |

1 = not at all sure

10 = extremely sure

3. I feel vulnerable to COVID-19 infection:

|                       |                       |                       |                       |                       |                       |                       |                       |                       |                       |
|-----------------------|-----------------------|-----------------------|-----------------------|-----------------------|-----------------------|-----------------------|-----------------------|-----------------------|-----------------------|
| 1                     | 2                     | 3                     | 4                     | 5                     | 6                     | 7                     | 8                     | 9                     | 10                    |
| <input type="radio"/> |

1 = I do not feel vulnerable at all

10 = extremely vulnerable

4. I think my chances of getting infected with COVID-19 are:

|                       |                       |                       |                       |                       |                       |                       |                       |                       |                       |
|-----------------------|-----------------------|-----------------------|-----------------------|-----------------------|-----------------------|-----------------------|-----------------------|-----------------------|-----------------------|
| 1                     | 2                     | 3                     | 4                     | 5                     | 6                     | 7                     | 8                     | 9                     | 10                    |
| <input type="radio"/> |

1 = non-existent / zero

10 = extremely high

#### (IV) THE PERCEIVED RISK REGARDING VACCINATION

I agree with the statements below:

|                                                                                                 | 0                   | 1               | 2                          | 3                 | 4             |
|-------------------------------------------------------------------------------------------------|---------------------|-----------------|----------------------------|-------------------|---------------|
|                                                                                                 | Do not agree at all | Rather disagree | Neither agree nor disagree | I rather disagree | Totally agree |
| 1. Vaccines are effective in preventing disease                                                 |                     |                 |                            |                   |               |
| 2. Getting through the disease provides better immunity than the vaccine                        |                     |                 |                            |                   |               |
| 3. I usually do what my doctor recommends                                                       |                     |                 |                            |                   |               |
| 4. Vaccinating myself against Covid-19 is a good way to protect myself from the virus infection |                     |                 |                            |                   |               |
| 5. Family and friends generally think the vaccine is a good idea                                |                     |                 |                            |                   |               |
| 6. To protect public health we should follow the government's vaccine instructions              |                     |                 |                            |                   |               |

|                                                                                |  |  |  |  |  |
|--------------------------------------------------------------------------------|--|--|--|--|--|
|                                                                                |  |  |  |  |  |
| 7. Patients at risk should be vaccinated first                                 |  |  |  |  |  |
| 8. I need more information than I have now to decide whether to get vaccinated |  |  |  |  |  |

## (V) ATTITUDE TOWARDS UNCERTAINTY

For the statements below, mark the extent to which you agree or disagree:

1. There is always a right way and a wrong way to do things

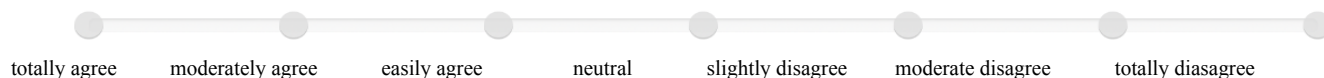

2. Practically, every problem also has a solution

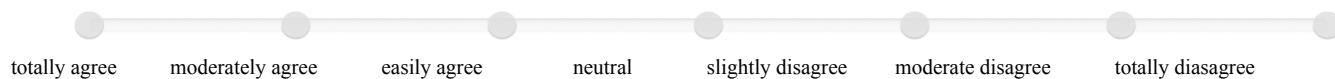

3. I feel relieved when an unclear situation becomes clear



4. It is difficult for me to make a decision when I am not sure of the outcome

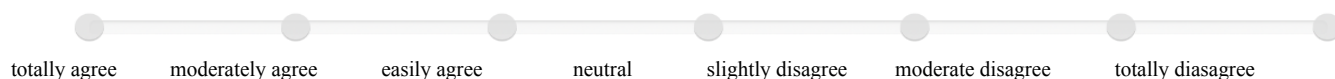

## (VI) OTHERS

### Sociodemographic factors

- Married YES / NO
- Children: YES / NO, if yes, how many? \_\_\_\_\_, what age? \_\_\_\_\_
- Last school graduated:

### Use of social media

#### 1. Social networks used:

- ☐ Facebook: under 1h / day; 1-3 hours/day; 3-5 hours/day; over 5 hours/day
- ☐ Instagram: under 1h / day; 1-3 hours/day; 3-5 hours/day; over 5 hours/day
- ☐ TikTok: under 1h / day; 1-3 hours/day; 3-5 hours/day; over 5 hours/day
- ☐ Tinder: under 1h / day; 1-3 hours/day; 3-5 hours/day; over 5 hours/day
- ☐ Telegram: under 1h / day; 1-3 hours/day; 3-5 hours/day; over 5 hours/day
- ☐ Others. Which? \_\_\_\_\_

#### 2. I am confident about the information on social networks, regarding COVID-19:

|                       |                       |                       |                       |                       |                       |                       |                       |                       |                       |
|-----------------------|-----------------------|-----------------------|-----------------------|-----------------------|-----------------------|-----------------------|-----------------------|-----------------------|-----------------------|
| 1                     | 2                     | 3                     | 4                     | 5                     | 6                     | 7                     | 8                     | 9                     | 10                    |
| <input type="radio"/> |

1 = not at all sure

10 = extremely sure

### Preventive behaviors adopted:

What methods have I used to protect myself from infection with COVID-19?

- ☐ Wearing the mask very often / often / neither often nor rarely / rarely / very rarely
- ☐ Use of disinfectant gel very often / often / neither often nor rarely / rarely / very rarely
- ☐ Hand washing min 20 s very often / often / neither often nor rarely / rarely / very rarely
- ☐ Avoiding crowded places very often / often / neither often nor rarely / rarely / very rarely
- ☐ Use of disinfectants very often / often / neither often nor rarely / rarely / very rarely
- ☐ Information from several sources very often / often / neither often nor rarely / rarely / very rarely
- ☐ Others. Which? \_\_\_\_\_ very often / often / neither often nor rarely / rarely / very rarely

### Have you been vaccinated against COVID-19? YES/NO

If YES, month\_\_\_\_, year\_\_\_\_, which vaccine\_\_\_\_, no doses\_\_

If NO, what were the reasons?

- ☐ I do not trust the effectiveness of the vaccine
- ☐ I have other diseases and I am afraid that they will get worse after the vaccination
- ☐ I do not like to be coerced
- ☐ I think the vaccine is making me sick
- ☐ I read information that convinced me not to do it (like? \_\_\_\_\_

☐ Others. Which? \_\_\_\_\_

**Confidence in your own beliefs**

How confident am I about my decision to get vaccinated against COVID-19:

|                       |                       |                       |                       |                       |                       |                       |                       |                       |                       |
|-----------------------|-----------------------|-----------------------|-----------------------|-----------------------|-----------------------|-----------------------|-----------------------|-----------------------|-----------------------|
| 1                     | 2                     | 3                     | 4                     | 5                     | 6                     | 7                     | 8                     | 9                     | 10                    |
| <input type="radio"/> |

1 = not at all sure

10 = extremely sure

Date: \_\_\_\_\_

Operator (initials) \_\_\_\_\_

Place/section: \_\_\_\_\_
