# Supplementary material for: Cognitive and Behavioral Factors Predicting the Decision to Vaccinate against COVID-19 in Clinical Psychiatric Population—A Cross-Sectional Survey
Source: Vaccines (Basel). 2023 Feb 15;11(2):441. doi: 10.3390/vaccines11020441 (PMC9961952; doi:10.3390/vaccines11020441)
Supplement: Supplementary file 1 [file vaccines-11-00441-s001.zip]

Archive with 5 entries (5 files):
- SM_Annex S1 - Questionnaire.pdf
- Table S1 SM_STROBE Checklist.pdf
- Table S2 SM_Normality_tests.pdf
- Table S3 SM_Logistic_Regression_results.pdf
- Table S4 SM_TOST_correlations.pdf
